# Supplementary material for: The extent of residual WT HSPCs is associated with the degree of anemia in patients with SF3B1-mutated MDS-RS
Source: PubMed Central journal article supplement — Blood Adv. 2022 Aug 12;6(16):4705–9. doi: 10.1182/bloodadvances.2022007858 (PMC9631652; doi:10.1182/bloodadvances.2022007858), 2022-08-12
Supplement: advancesADV2022007858-suppl1.pdf [file advancesADV2022007858-suppl1.pdf]

## Supplemental Tables

**Supplemental Table 1**

|                                 |                                                                                                                                                                                                         |
|---------------------------------|---------------------------------------------------------------------------------------------------------------------------------------------------------------------------------------------------------|
| IPSS-R* risk score              | - Very low, low or intermediate risk                                                                                                                                                                    |
| Anemic status                   | - Symptomatic anemia (patient-reported symptoms)<br>- Transfusion-dependent anemia, irrespective of symptoms<br>- Preferably, patients should be treated before the onset of permanent transfusion need |
| Criteria for non-recommendation | - S-Epo >500 U/L + transfusion intensity $\geq$ 2 units / 4 weeks                                                                                                                                       |

\*Revised International Prognostic Scoring System

**Supplemental Table 1.** MDS-RIGHT indications for treatment with erythropoiesis-stimulating agents (ESAs).<sup>1</sup>

**Supplemental Table 2**

| Response category  | n (%)   | Mutations, n (%) |           |                  | SF3B1 VAF, median (interquartile range) |
|--------------------|---------|------------------|-----------|------------------|-----------------------------------------|
|                    |         | SF3B1 only       | SF3B1 + 1 | SF3B1 + $\geq$ 2 |                                         |
| Complete response* | 16 (53) | 12 (71)          | 3 (38)    | 1 (20)           | 35 (28-41)                              |
| Partial response*  | 13 (43) | 5 (29)           | 5 (62)    | 3 (60)           | 38 (29-41)                              |
| No response        | 1 (3)   | 0 (0)            | 0 (0)     | 1 (20)           | 38 (NA)                                 |
| P†                 | NA      | 0.18             |           |                  | 0.56                                    |

\*Complete response = Hb  $\geq$ 15.0 g/dL, partial response = Hb increase of  $\geq$ 1.5 g/dL or achieving transfusion independency

† Complete vs. partial responders; Fisher's exact test for categorical variables, Wilcoxon rank sum test for continuous variables

**Supplemental Table 2.** *SF3B1* mutational load and number of co-mutations are not associated with type of response to ESA in MDS-RS.

## Supplemental Figure

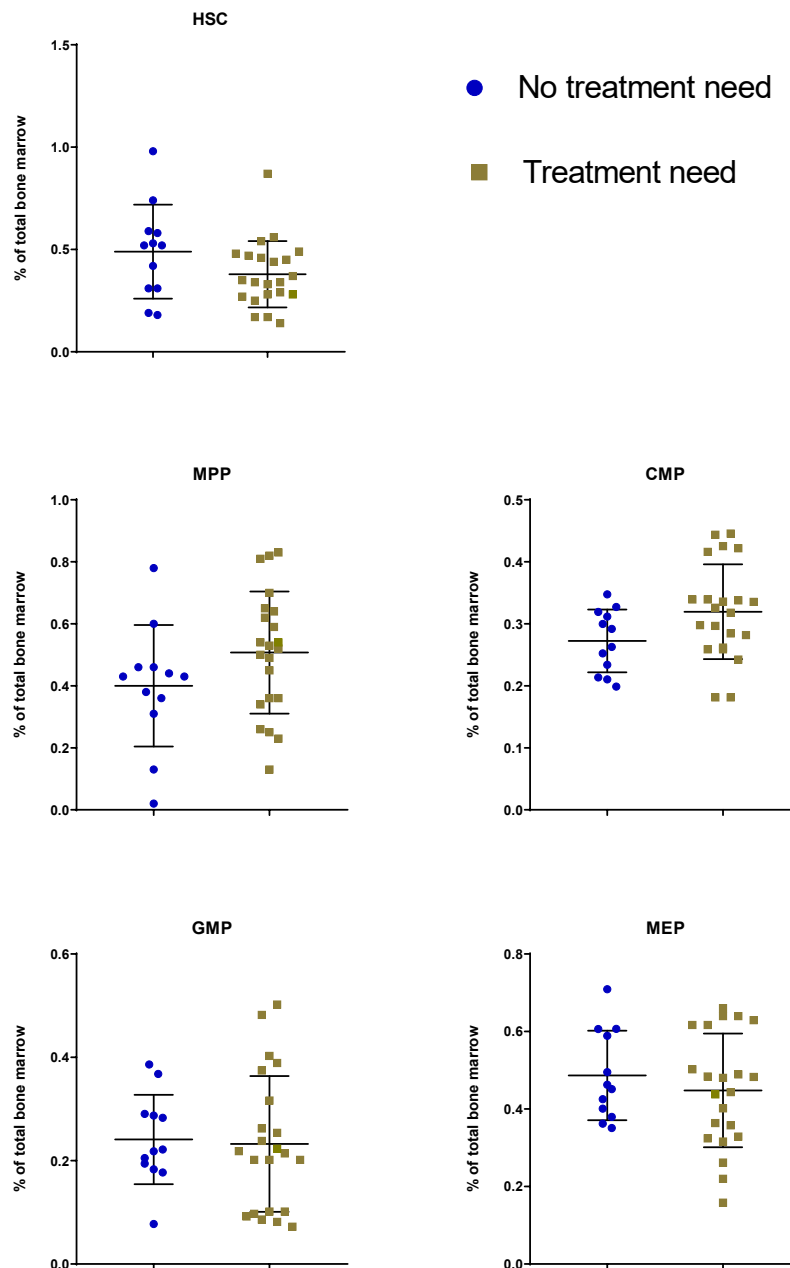

**Supplemental Figure 1.** Treatment need status does not impact HSPCs subset frequencies. Total bone marrow frequencies of the different HSPCs populations: hematopoietic stem cells (HSC), multipotent progenitor cells (MPP), common myeloid progenitor cells (CMP), granulocyte-macrophage progenitor cells (GMP) and megakaryocyte-erythroid progenitor cells (MEP). Comparison patients with asymptomatic anemia (no treatment need (blue)) and patients with symptomatic anemia (treatment need (yellow)). Number of patients included: no treatment need n= 12; treatment need= 22. Mann-Whitney U test was used to calculate p-values and no statistically significant differences were identified.

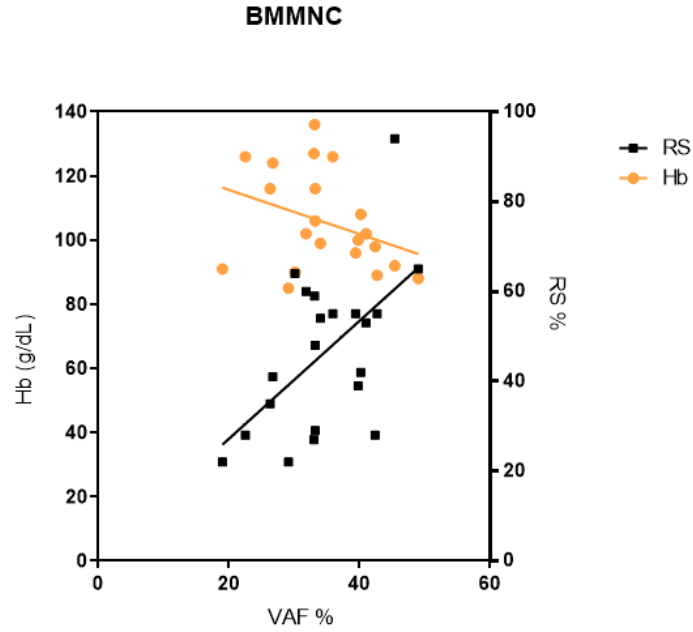

**Supplemental Figure 2.** Correlation between *SF3B1* variant allele frequency (VAF%) and ring sideroblasts (RS) and hemoglobin levels (Hb g/dl). BM ring sideroblast % increases as VAF grows ( $p=0.008$ ), while the relation to Hb levels is not significant ( $p=0.127$ ). Numbers of investigated patients: 21. Linear regression test was used to fit the straight line and calculate statistical significance.

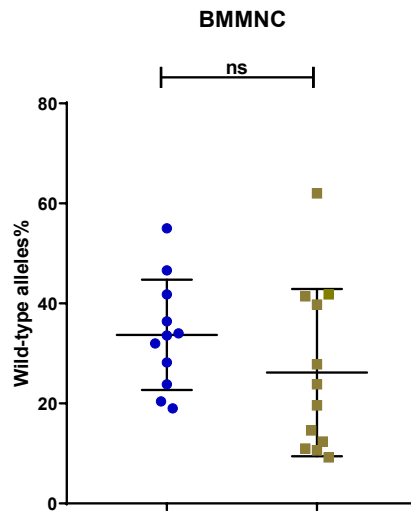

**Supplemental Figure 3.** Comparison of the proportions of the remaining wild-type allele % between patients with asymptomatic anemia (no treatment need (blue)) and patients with symptomatic anemia (treatment need (yellow)). Number of patients included: no treatment need  $n=12$ ; treatment need  $n=22$ . Whitney U test was used to calculate  $p$ -values and no statistically significant difference was identified.

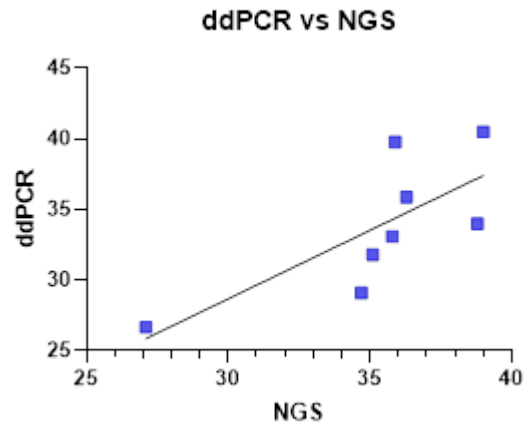

**Supplemental Figure 4.** Correlation between ddPCR and Next-Generation Sequencing (NGS). Numbers of investigated patients: 8. Linear regression test was used to fit the straight line and calculate statistical significance.

## Supplemental methods

### Patient samples, flow cytometry and fluorescent-activated cell sorting (FACS)

Cryopreserved BM mononuclear cells (MNCs) or CD34-enriched cells were thawed in thawing medium (IMDM + 20% FBS + 0.1 mg/ml DNase I (Merck, Darmstadt, Germany)) and washed with Phosphate Buffered Saline (PBS, Thermo Fisher Scientific, Waltham, MA, USA) with 5% FBS before staining. Cells were sorted on a FACS ARIA II Fusion (Becton Dickinson, Franklin Lakes, NJ, USA) at the WIRM FACS facility at the Karolinska Institute, Flemingsberg. All experiments included fluorescent-minus-one (FMO) and single-stained controls.<sup>2</sup> A previously described strategy was used to define the HSPC populations.<sup>3,4</sup>

### *Antibody panel for hematopoietic stem and progenitor cells*

| Antibody | Conjugate | Clone    | Supplier          |
|----------|-----------|----------|-------------------|
| CD38     | TxRED     | MHCD3817 | Life Technologies |
| CD45RA   | BV421     | HI100    | Biolegend         |
| CD71     | FITC      | CY1G4    | Biolegend         |
| CD123    | PECy7     | 6H6      | Biolegend         |
| CD90     | PE        | 5E10     | Biolegend         |
| CD34     | APC       | 581      | Biolegend         |
| CD2      | PE-Cy5    | RPA-2.10 | Biolegend         |
| CD3      | PE-Cy5    | HIT3a    | Biolegend         |
| CD4      | PE-Cy5    | RPA-T4   | Biolegend         |
| CD7      | PE-Cy5    | CD7-6B7  | Biolegend         |
| CD8      | PE-Cy5    | RPA-T8   | Biolegend         |
| CD10     | PE-Cy5    | HI10a    | Biolegend         |
| CD11b    | PE-Cy5    | ICRF44   | Biolegend         |
| CD14     | PE-Cy5    | RM052    | Beckman Coulter   |
| CD19     | PE-Cy5    | HIB19    | Biolegend         |
| CD20     | PE-Cy5    | 2H7      | Biolegend         |
| CD56     | PE-Cy5    | B159     | BD Biosciences    |
| CD235a   | PE-Cy5    | HIR2     | Biolegend         |
| 7AAD     | PE-Cy5    |          | eBiosciences      |

### Droplet digital PCR (ddPCR)

PCR reaction mixtures were prepared according to the manufacturer's protocols using the Supermix for Probes without dUTP (Bio-Rad, Berkeley, CA, USA), respective assay, 20 ng of DNA and nuclease-free water (Life Technologies, Carlsbad, CA, USA). 20 µl of PCR reaction mixture was transferred to a sample well in a disposable droplet generator cassette (Bio-Rad); 70 µl of droplet generation oil (Bio-Rad) was then loaded into the oil well for each channel and the cassette loaded into a QX200 Droplet Digital PCR System (Bio-Rad). The droplets were then transferred to a 96-well PCR semi-skirted plate (Eppendorf, Hamburg, Germany). Emulsified PCR reactions were run on a C1000 Touch thermal cycler (Bio-Rad) incubating the plates at 95°C for 10 min followed by 40 cycles of 94°C for 30 seconds and 55°C for 60 seconds, 10 minutes incubation at 98°C, and 4°C for 10 minutes. Each well was then read using the QX200 Droplet Reader (Bio-Rad). Two-dimensional plots displaying measured HEX (wild type) and FAM (mutant) fluorescent signal for each droplet show four main populations; droplets containing no amplified DNA and no fluorescent signal (lower left quadrant; HEX-FAM-), droplets with only mutant DNA and high FAM fluorescent signal (upper left quadrant), droplets with only wild-type DNA and high

HEX fluorescent signal (lower right quadrant) and droplets with both wild-type and mutant amplified DNA and high FAM and HEX fluorescent signal (upper right quadrant). QuantaSoft software (Bio-Rad) was used to calculate the VAF of the mutated allele based on Poisson distribution. We included at least one known mutated sample, one wildtype sample and one H<sub>2</sub>O sample as controls in every run. All the primers and probes were designed and ordered from Bio-Rad using available online tools.

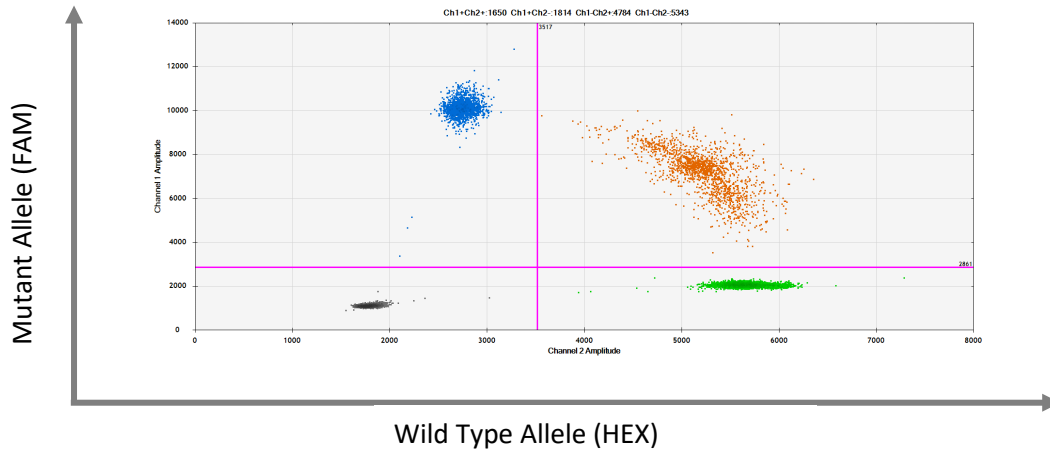

Representative ddPCR 2D plot for quantification of the presence of *SF3B1* E622D bulk BM MNC isolated from peripheral blood from a selected patient. Numbers in graph quadrants show threshold value, events in top left and top right quadrants are included to support detection of mutant allele. FAM: Mutant allele, HEX: Wild type allele. In this study we aimed to analyzed using ddPCR a maximum of 1000 cells per RepliG-amplified sample, with a minimum number of (70) cells used equaling a LoD (level of detection) of (1/70) %.

## References

1. Therapeutic options for MDS, approved by EMA or part of standard care. (Accessed Oct 1, 2020, at [https://mds-europe.org/management/treatment/mds-right/therapeutic\\_options/approved.](https://mds-europe.org/management/treatment/mds-right/therapeutic_options/approved.))
2. Maecker HT, Trotter J. Flow cytometry controls, instrument setup, and the determination of positivity. *Cytometry Part A* 2006;69A:1037-42.
3. Woll PS, Kjallquist U, Chowdhury O, et al. Myelodysplastic syndromes are propagated by rare and distinct human cancer stem cells in vivo. *Cancer Cell* 2014;25:794-808.
4. Tehranchi R, Woll PS, Anderson K, et al. Persistent malignant stem cells in del(5q) myelodysplasia in remission. *N Engl J Med* 2010;363:1025-37.
